# Supplementary material for: Three-dimensional crystal structure of novel aluminophosphate PST-5 solved using a powder charge flipping method
Source: Royal Society of Chemistry journal article supplement (doi:10.1039/c7ra05100j), 2017-01-01
Supplement: c7ra05100j2.pdf [file c7ra05100j2.pdf]

## Supporting information

# Three-dimensional crystal structure of novel aluminophosphate PST-5 solved by powder charge flipping thod

Shuai Chang<sup>a</sup>, Hoi-Gu Jang<sup>a</sup>, Kwan-Young Lee<sup>b</sup> and Sung June Cho<sup>a,\*</sup>

<sup>a</sup>*Department of Chemical Engineering, Chonnam National University, 77 Yongbong-Ro, Buk-gu, Gwangju 61186, Republic of Korea*  
E-mail: [sjcho@jnu.ac.kr](mailto:sjcho@jnu.ac.kr)

<sup>b</sup>*Department of Chemical and Biological Engineering, Korea University, 145 Anam-ro, Seongbuk-gu, Seoul 02841, Republic of Korea*

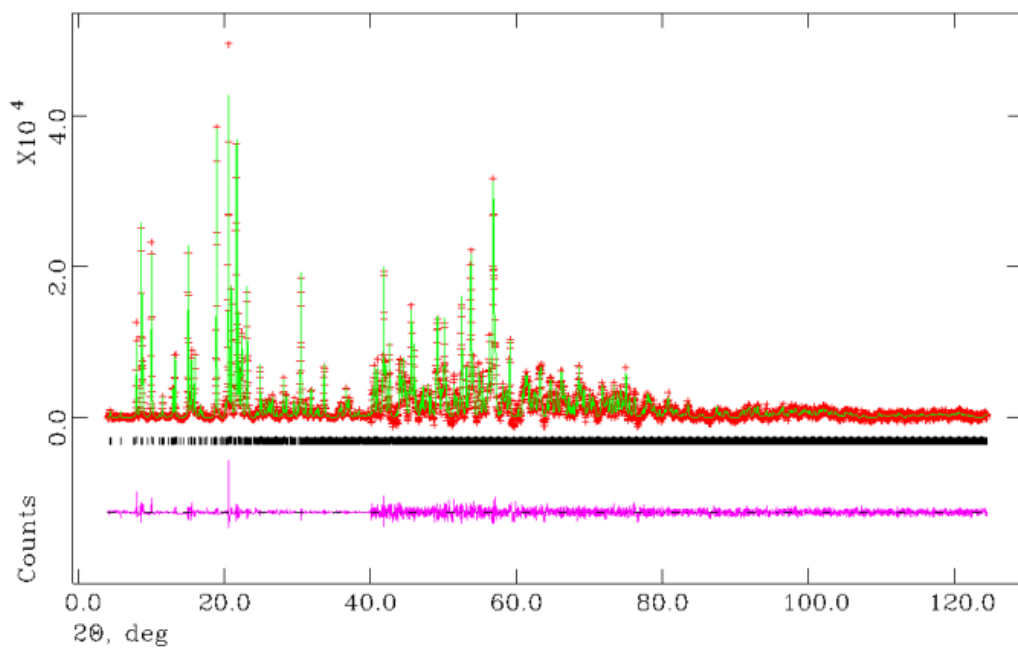

**Fig. S1** Rietveld refinement of XRPD patterns of PST-6 (1day) after the calcination at 823 K flowing oxygen.

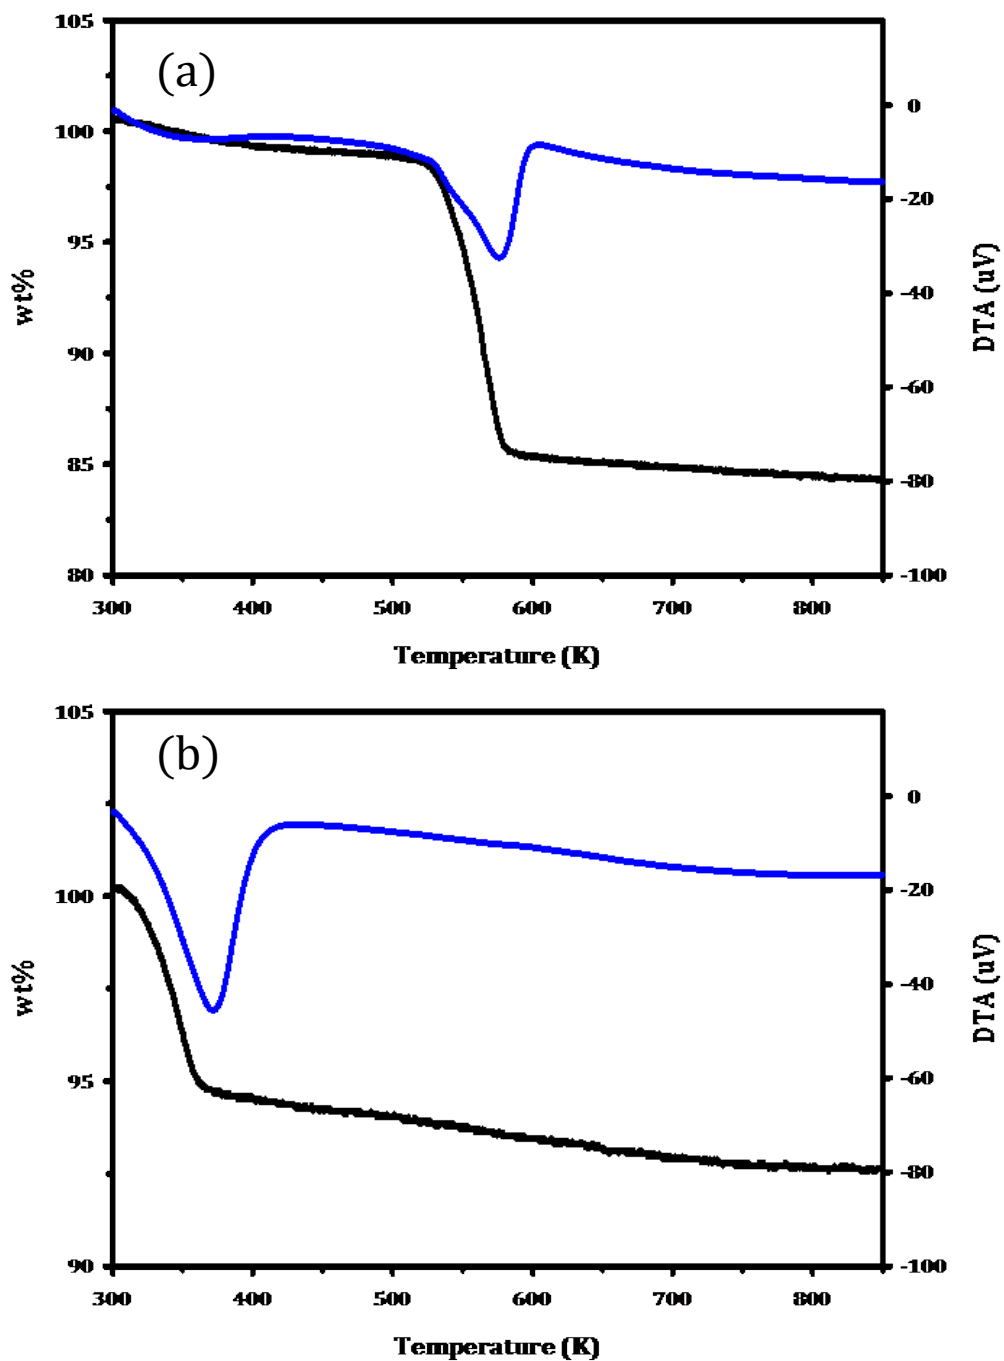

**Fig. S2** TG-DTA of (a) PST-5 and (b) PST-6 after the calcination at 423 K with ozone flowing oxygen. The black and blue lines indicate the weight decrease and the DTA against the temperature.

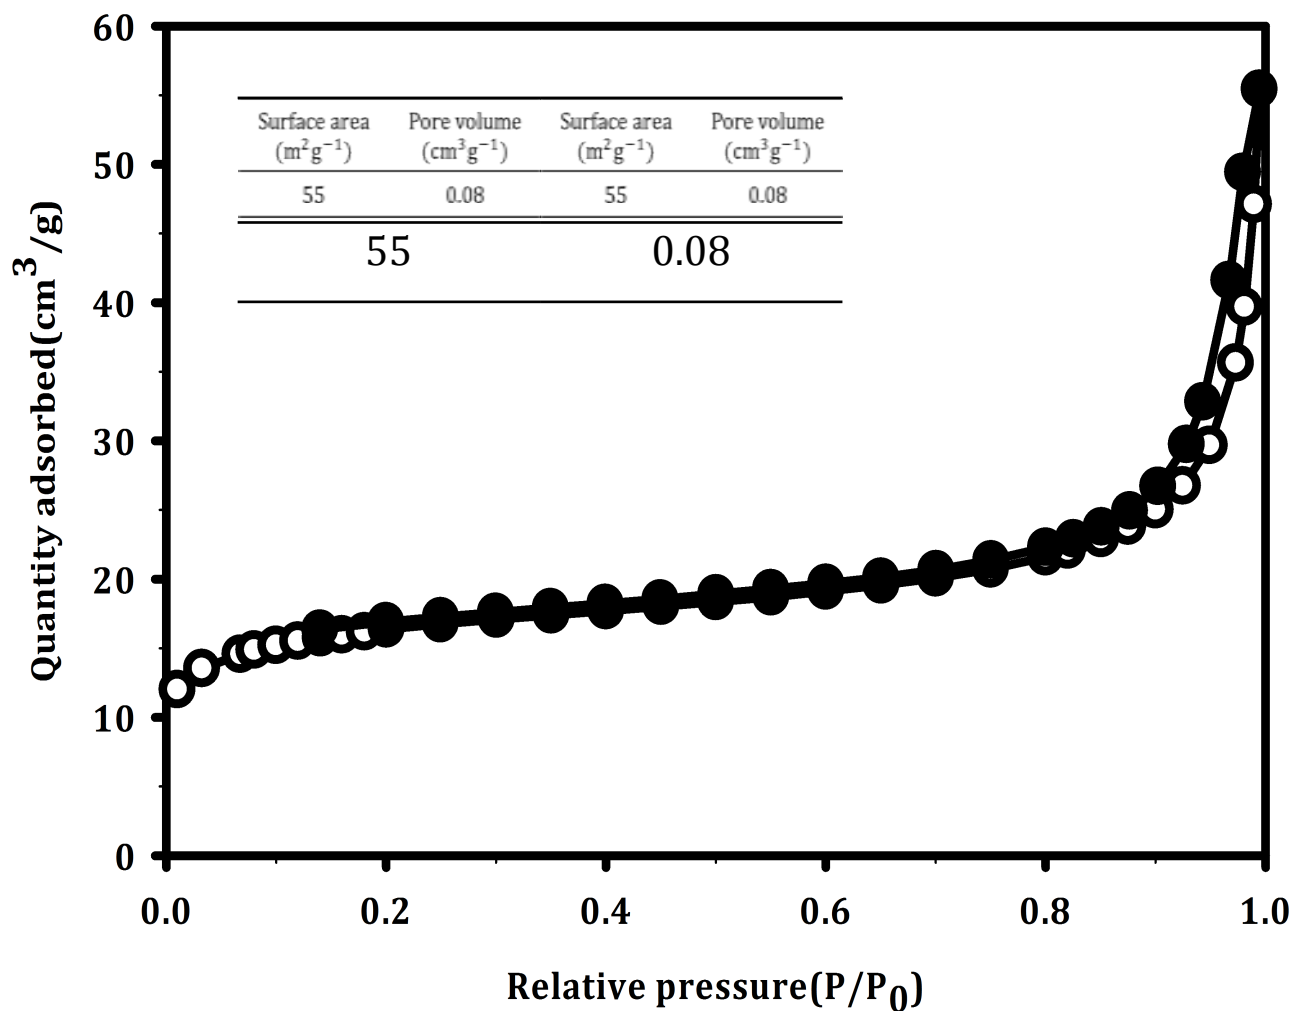

**Fig. S3** Nitrogen adsorption-desorption isotherm at 77 K on PST-6 after the calcination at 423 K with ozone flowing oxygen. The open and close symbol represents the adsorption and desorption isotherm, respectively.

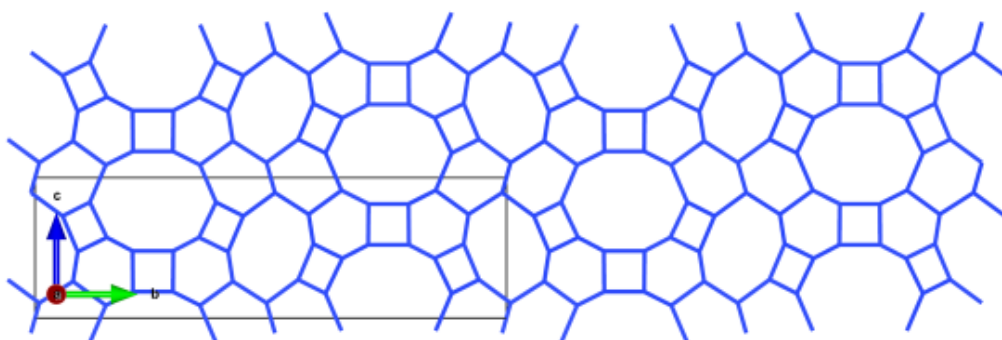

**Fig. S4** Best possible framework structure for PST-5 obtained from *Focus* program suites.

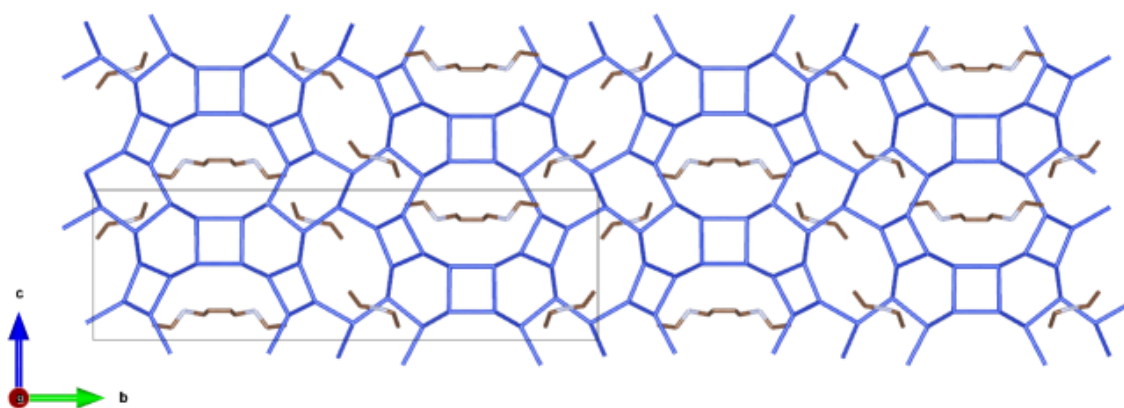

**Fig. S5** Location of DEA in the framework structure for PST-5. The oxygen atom is omitted for clarity.
